# Supplementary material for: Enhanced hemocompatibility and antibacterial activity of biodegradable poly(ester-urethane) modified with quercetin and phosphorylcholine for durable blood-contacting applications
Source: Royal Society of Chemistry journal article supplement (doi:10.1039/d3tb00596h), 2023-01-01
Supplement: d3tb00596h1.pdf [file d3tb00596h1.pdf]

Supplementary Materials

**Enhanced hemocompatibility and antibacterial activity of  
biodegradable poly(ester-urethane) modified with quercetin and  
phosphorylcholine for durable blood-contacting application**

Tiantian Hao,<sup>†a</sup> Guangliang Niu,<sup>†a</sup> Hao Zhang,<sup>b</sup> Yuzheng Zhu,<sup>b</sup> Chunxia Zhang,<sup>c</sup> Fanzhao Kong,<sup>c</sup> Jing Xu,<sup>d</sup> Zhaosheng Hou<sup>\*a</sup>

<sup>a</sup> *College of Chemistry, Chemical Engineering and Materials Science, Shandong Normal University, Jinan 250014, PR China*

<sup>b</sup> *Shandong Tianming Pharmaceutical Co, Ltd., Jinan 250104, PR China*

<sup>c</sup> *Engineering and Technology Research Center for Implant Materials of Shandong Province, Success Bio-Tech Co., Ltd., Jinan 250101, PR China*

<sup>d</sup> *School of Chemistry and Pharmaceutical Engineering, Qilu University of Technology (Shandong Academy of Sciences), Jinan 250353, PR China*

---

\* Corresponding author.

*E-mail address:* houzs@sdsu.edu.cn (Z. Hou)

<sup>†</sup>These authors contributed equally to this work.

## Table of Contents

**Fig. S1.** Typical optical photographs of a) PEU-P<sub>1.0</sub>Q<sub>0</sub>, b) PEU-P<sub>0.75</sub>Q<sub>0.25</sub>, c) PEU-P<sub>0.5</sub>Q<sub>0.5</sub>, d) PEU-P<sub>0.25</sub>Q<sub>0.75</sub> and e) PEU-P<sub>0</sub>Q<sub>1.0</sub> films.

**Fig. S2.** <sup>1</sup>H NMR spectra of a) TG, b) MPC and c) PC-diol.

**Fig. S3.** FT-IR spectra of a) TG, b) MPC and c) PC-diol.

**Fig. S4.** TGA and DTGA curves of a) PEU-P<sub>1.0</sub>Q<sub>0</sub>, b) PEU-P<sub>0.75</sub>Q<sub>0.25</sub>, c) PEU-P<sub>0.5</sub>Q<sub>0.5</sub>, d) PEU-P<sub>0.25</sub>Q<sub>0.75</sub>, e) PEU-P<sub>0</sub>Q<sub>1.0</sub> and f) QC.

**Fig. S5.** XPS charts of PEU-P<sub>0.5</sub>Q<sub>0.5</sub> film before and after contact with water.

**Table S1.** Characteristic values of PEU-PQ films from DSC thermograms.

**Table S2.** Characteristic values of PEU-PQ films and QC powder from TGA and DTGA curves.

**Table S3.** Mechanical properties of PEU-PQ films ( $n=3$ ).

**Table S4.** Weight-average molecular weight and molecular weight distribution of PEU-PQ.

**Table S5.** Inhibitory zone diameters of PEU-PQ films against *E. coli* and *S. aureus* ( $n=3$ ).

**Table S6.** Quantification of adherent platelets on the PEU-PQ surface.

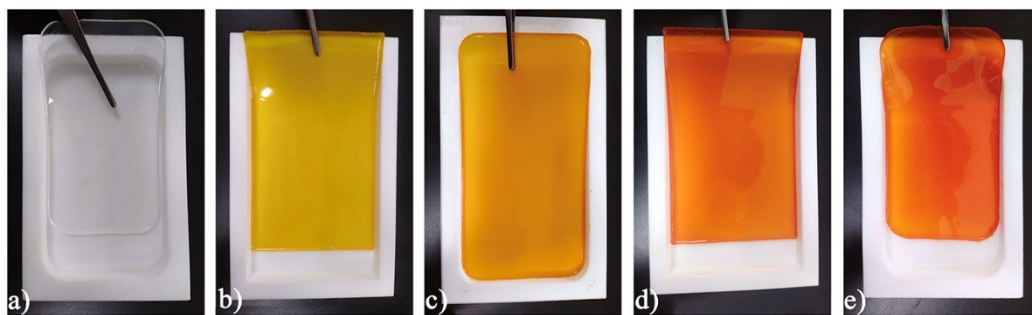

**Fig. S1.** Typical optical photographs of a) PEU-P<sub>1.0</sub>Q<sub>0</sub>, b) PEU-P<sub>0.75</sub>Q<sub>0.25</sub>, c) PEU-P<sub>0.5</sub>Q<sub>0.5</sub>, d) PEU-P<sub>0.25</sub>Q<sub>0.75</sub> and e) PEU-P<sub>0</sub>Q<sub>1.0</sub> films.

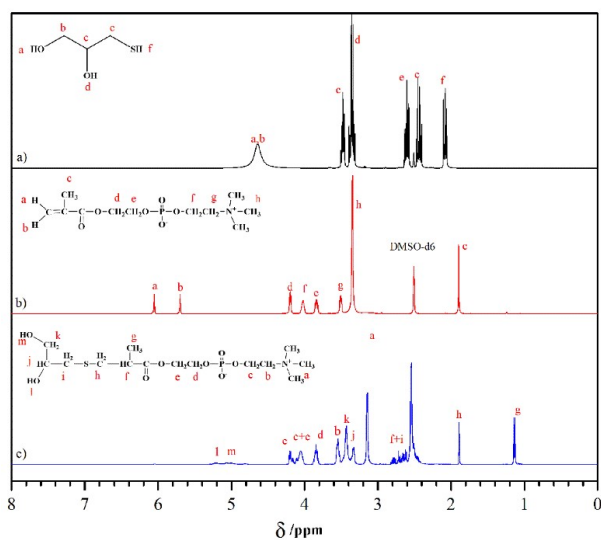

**Fig. S2.** <sup>1</sup>H NMR spectra of a) TG, b) MPC and c) PC-diol.

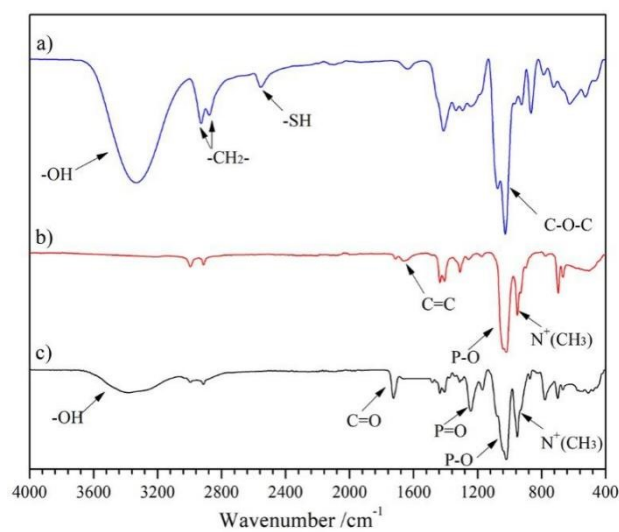

**Fig. S3.** FT-IR spectra of a) TG, b) MPC and c) PC-diol.

**Table S1.** Characteristic values of PEU-PQ films from DSC thermograms.

| Film samples                            | $T_g / ^\circ\text{C}$ | $T_m / ^\circ\text{C}$ | $\Delta H_m / \text{J}\cdot\text{g}^{-1}$ |
|-----------------------------------------|------------------------|------------------------|-------------------------------------------|
| PEU-P <sub>1.0</sub> Q <sub>0</sub>     | -53.6                  | 98.3                   | 19.8                                      |
| PEU-P <sub>0.75</sub> Q <sub>0.25</sub> | -50.4                  | 101.3                  | 17.2                                      |
| PEU-P <sub>0.5</sub> Q <sub>0.5</sub>   | -47.8                  | 103.3                  | 15.3                                      |
| PEU-P <sub>0.25</sub> Q <sub>0.75</sub> | -44.7                  | 107.5                  | 13.8                                      |
| PEU-P <sub>0</sub> Q <sub>1.0</sub>     | -43.2                  | 109.1                  | 10.1                                      |

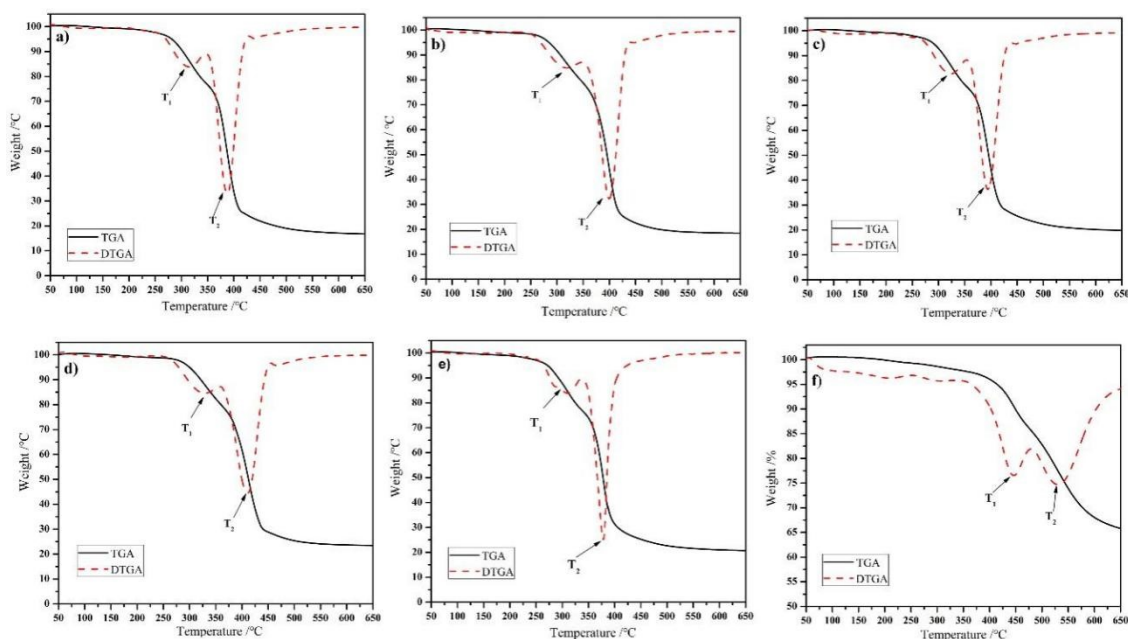**Fig. S4.** TGA and DTGA curves of a) PEU-P<sub>1.0</sub>Q<sub>0</sub>, b) PEU-P<sub>0.75</sub>Q<sub>0.25</sub>, c) PEU-P<sub>0.5</sub>Q<sub>0.5</sub>, d) PEU-P<sub>0.25</sub>Q<sub>0.75</sub>, e) PEU-P<sub>0</sub>Q<sub>1.0</sub> and f) QC.**Table S2.** Characteristic values of PEU-PQ films and QC powder from TGA and DTGA curves.

| Samples                                 | $T_{5\%} / ^\circ\text{C}$ | $T_{\text{max-1}} / ^\circ\text{C}$ | $T_{\text{max-2}} / ^\circ\text{C}$ | $W_r / \%$ |
|-----------------------------------------|----------------------------|-------------------------------------|-------------------------------------|------------|
| PEU-P <sub>1.0</sub> Q <sub>0</sub>     | 273.8                      | 315.3                               | 387.3                               | 7.3        |
| PEU-P <sub>0.75</sub> Q <sub>0.25</sub> | 276.5                      | 316.9                               | 394.3                               | 12.1       |
| PEU-P <sub>0.5</sub> Q <sub>0.5</sub>   | 281.2                      | 320.6                               | 401.2                               | 14.6       |
| PEU-P <sub>0.25</sub> Q <sub>0.25</sub> | 290.5                      | 324.5                               | 406.8                               | 18.1       |
| PEU-P <sub>0</sub> Q <sub>1.0</sub>     | 298.4                      | 329.2                               | 411.4                               | 21.0       |
| QC                                      | 385.3                      | 439.2                               | 480.2                               | 68.3       |

$T_{5\%}$ : decomposition temperature at 5% weight loss.

$T_{\text{max-x}}$ : maximum decomposition temperature at stage x.

$W_r$ : residual weight at test endpoint.

**Table S3.** Mechanical properties of PEU-PQ films ( $n = 3$ ).

| Film samples                            | UTS /MPa   | EBA /%   | FT /MJ·m <sup>-3</sup> |
|-----------------------------------------|------------|----------|------------------------|
| PEU-P <sub>1.0</sub> Q <sub>0</sub>     | 11.63±0.86 | 817.9±80 | 37.55                  |
| PEU-P <sub>0.75</sub> Q <sub>0.25</sub> | 23.5±1.38  | 782.6±63 | 60.07                  |
| PEU-P <sub>0.5</sub> Q <sub>0.5</sub>   | 31.94±2.1  | 732.0±61 | 76.14                  |
| PEU-P <sub>0.25</sub> Q <sub>0.75</sub> | 47.91±3.2  | 642.1±55 | 90.44                  |
| PEU-P <sub>0</sub> Q <sub>1.0</sub>     | 61.75±3.8  | 541.9±42 | 110.08                 |

UTS: ultimate tensile strength; EAB: elongation at break; FT: fracture toughness

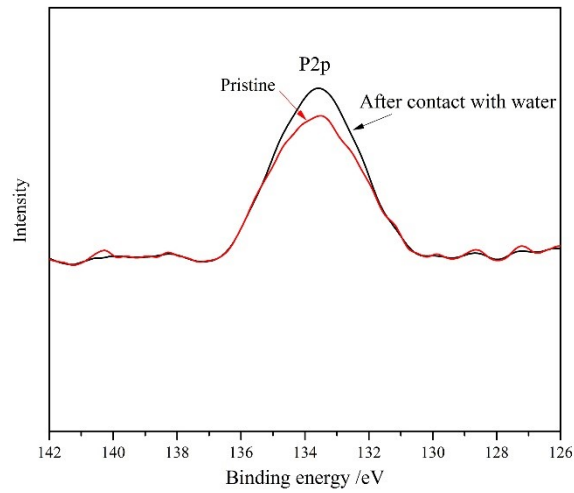**Fig. S5.** XPS charts of PEU-P<sub>0.5</sub>Q<sub>0.5</sub> film before and after contact with water.**Table S4.** Weight-average molecular weight and molecular weight distribution of PEU-PQ.

| Samples                        | PEU-P <sub>1.0</sub> Q <sub>0</sub> | PEU-P <sub>0.75</sub> Q <sub>0.25</sub> | PEU-P <sub>0.5</sub> Q <sub>0.5</sub> | PEU-P <sub>0.25</sub> Q <sub>0.75</sub> | PEU-P <sub>0</sub> Q <sub>1.0</sub> |
|--------------------------------|-------------------------------------|-----------------------------------------|---------------------------------------|-----------------------------------------|-------------------------------------|
| M <sub>w</sub> /kDa            | 105                                 | 102                                     | 113                                   | 112                                     | 124                                 |
| M <sub>w</sub> /M <sub>n</sub> | 1.76                                | 1.98                                    | 2.23                                  | 2.56                                    | 2.89                                |

M<sub>w</sub>: weight-average molecular weight; M<sub>w</sub>/M<sub>n</sub>: molecular weight distribution.

**Table S5.** Inhibitory zone diameters of PEU-PQ films against *E. coli* and *S. aureus*. ( $n = 3$ )

| Samples              | PEU-P <sub>1.0</sub> Q <sub>0</sub> | PEU-P <sub>0.75</sub> Q <sub>0.25</sub> | PEU-P <sub>0.5</sub> Q <sub>0.5</sub> | PEU-P <sub>0.25</sub> Q <sub>0.75</sub> | PEU-P <sub>0</sub> Q <sub>1.0</sub> | Positive control |
|----------------------|-------------------------------------|-----------------------------------------|---------------------------------------|-----------------------------------------|-------------------------------------|------------------|
| <i>E. coli</i> /mm   | 0                                   | 10.2±0.15                               | 13.1±0.2                              | 14.2±0.19                               | 15.5±0.22                           | 18.5±0.23        |
| <i>S. aureus</i> /mm | 0                                   | 18.1±0.21                               | 22.0±0.25                             | 24.6±0.25                               | 26.8±0.26                           | 39.0±0.28        |

**Table S6.** Quantification of adherent platelets on the PEU-PQ surface.

| Film samples                                     | PEU-P <sub>0</sub> Q <sub>1.0</sub> | PEU-P <sub>0.25</sub> Q <sub>0.75</sub> | PEU-P <sub>0.5</sub> Q <sub>0.5</sub> | PEU-P <sub>0.75</sub> Q <sub>0.25</sub> | PEU-P <sub>1.0</sub> Q <sub>0</sub> |
|--------------------------------------------------|-------------------------------------|-----------------------------------------|---------------------------------------|-----------------------------------------|-------------------------------------|
| Quantity of adherent platelets /mm <sup>-2</sup> | 18,800 ± 960                        | 7650 ± 540                              | 4,520 ± 320                           | 2,850 ± 170                             | 1050 ± 105                          |
